# Supplementary material for: Wild waterfowl migration and domestic duck density shape the epidemiology of highly pathogenic H5N8 influenza in the Republic of Korea
Source: PubMed Central journal article supplement (PMC4539883; doi:10.1016/j.meegid.2015.06.014), 2015-08
Supplement: mmc2.pdf [file mmc2.pdf]

a)

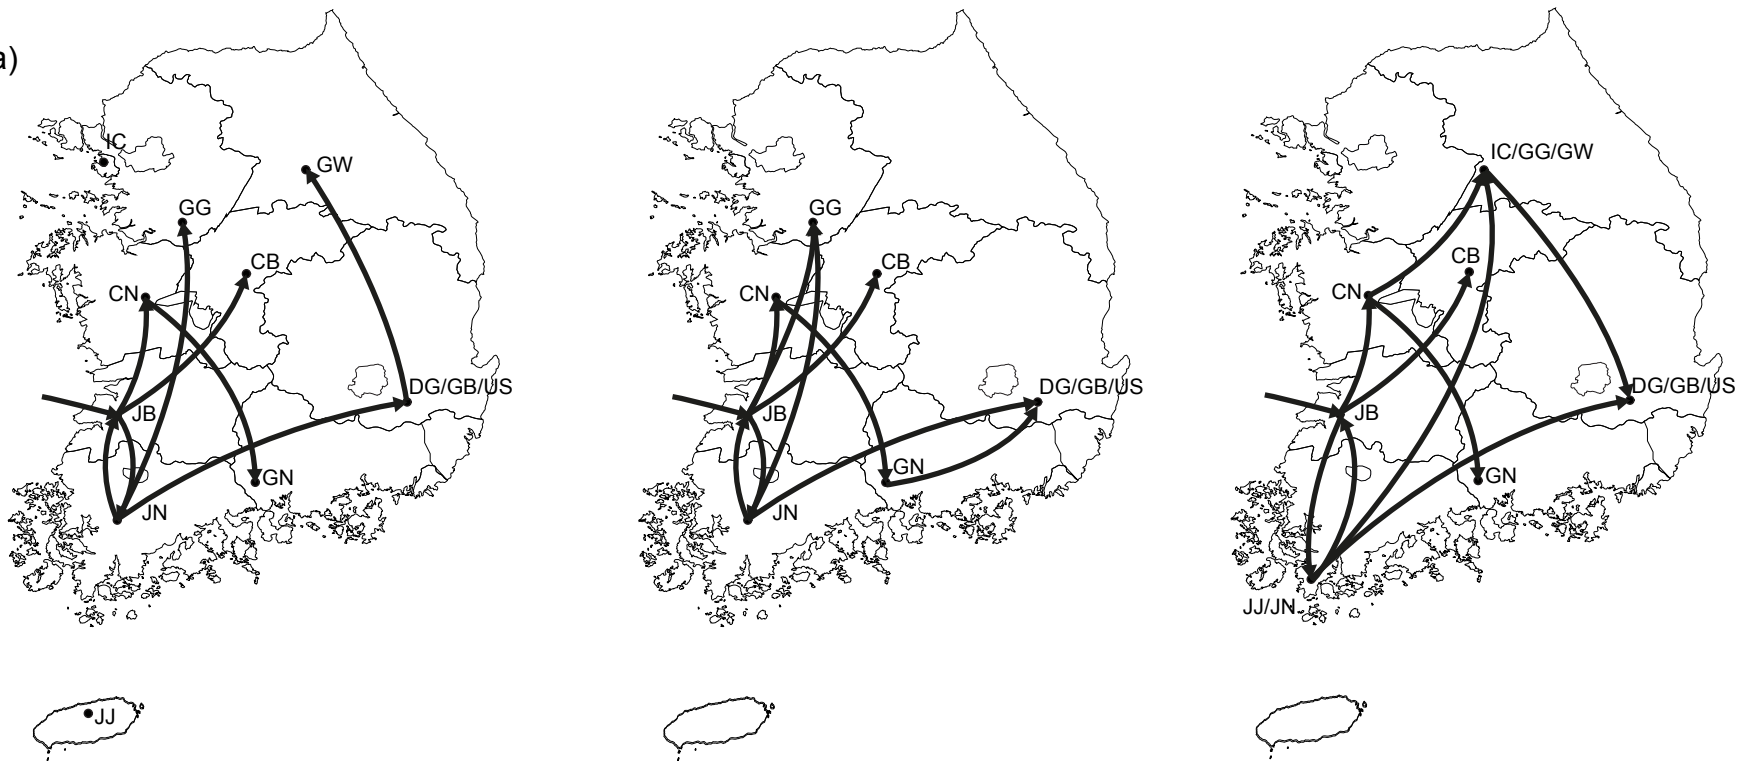

Fig. A.2. Effect of different sampling and grouping of provinces with only one sequence on phylogeographic inference. Arrows show inferred epidemiological links where Bayes Factor support for rate indicators >10, as determined using SPREAD. a) Results as shown in Figure 3. b) Sequences isolated in provinces from which only one sequence is available have been removed from the alignment (except DG/GB/US, which have been grouped). c) Sequences isolated in provinces from which only one sequence is available have been grouped with geographically neighbouring provinces for phylogeographic inference.
